# Supplementary material for: Efficacy of Racecadotril in acute diarrhea in children: systematic review of the literature and meta-analysis of randomized clinical trials
Source: Research Square preprint supplement (doi:10.21203/rs.3.rs-7066734/v1), 2025-07-25
Supplement: Supplementary file 1 [file 5d83e65a5245a5e723317e42.docx]

# **Supplemental material**

## **Appendix 1 : Studies excluded from the systematic review after full reading**

| **Excluded studies** | **Reason for exclusion** |
| --- | --- |
| **CTRI/2010/091/003067; 2011** | Corresponds to the protocol of one of the selected articles (*Kang et al* 2016) |
| ***Khan et al* 2020** | Non-randomized trial (Non Probability Consecutive Sampling) |
| ***Michael et al* 2014** | No placebo or blinding |
| ***Motahari et al* 2022** | No placebo or blinding |
| ***Sreenivas et al* 2017** | No blinding |

## **Appendix 2: Detailed characteristics of the different studies**

| ***Cézard et al* 2001** | |
| --- | --- |
| **Method** | Multicenter trial : 13 hospital centers in France  Randomized (method not specified)  Placebo controlled (Racecadotril and placebo in granule form of similar taste and appearance)  Double blind  Parallel arms  Follow-up duration: 6 days |
| **Participants** | Total: 172 patients   - Racecadotril group: n = 89 - Placebo group: n = 83   But final analysis involving 166 patients (84+82)  71 girls and 101 boys  Age: 1 to 36 months  Comparable groups  Inclusion criteria:   - patients with acute diarrhea - **≥** 3 loose stools per day for less than 72 hours, with at least 1 loose stool observed in hospital   Exclusion criteria:   - chronic diarrhea - a weight deficit for age ≥ 20% (according to the standards of the National Center for Health Statistics) - systemic disease - antibiotic, anti-diarrheal or aspirin treatment in the previous 48 hours |
| **Intervention** | Intervention group: Racecadotril + ORS  Dosage: 1.5mg/kg, 3 times a day  Control: Placebo + ORS  Dosage: 1.5mg/kg, 3 times a day |
| **Definition of recovery** | 2 stools formed in a row, or no stools for 12 hours |

| **Endpoints**  **+**  **Results** | **Primary endpoint :** Stool flow at 48 hours (in g/h)  **Mean result (± SD)** (Racecadotril vs Placebo):   - - 40% in the Racecadotril group   (estimate: 9.3 *(± 11)* vs 15.2 *(± 8.1)* )  Note: No detailed figure given by the author, result visible only in diagram form.  -> Estimates of means and SD made visually by reading the diagram (similar values found in the meta-analysis of Liang 2019 (11) .  → significant difference  **Secondary endpoints :**   - Duration of diarrhea in the Rotavirus-positive subgroup (in hours)   **Median** (Racecadotril VS placebo) (no measurement of dispersion):   - 6.9 vs 36 (p = 0.02)   → significant difference   - Average stool flow at 24 hours:   **Result** (Racecadotril VS Placebo):   - - 35% in the Racecadotril group (no detailed figure)   → significant difference   - Tolerance :   **Result :**   - 21 cases of adverse effects (10 in the Racecadotril group, 11 in the Placebo group, concerning 9 patients in each group).   Most were mild to moderate, 2 are believed to be treatment-related (1 for Racecadotril, 1 for Placebo) |
| --- | --- |
| **Analysis** | ITT : No  “Full data set” analysis, with replacement of missing data by the LOCF method, but covering 166 patients (84+82) and not 172.  Missing data :   - 4 patients excluded because stool weight not recorded (3 in the Racecadotril group, 1 in the Placebo group) - 2 other patients in the placebo group considered missing (stool weight cannot be estimated because no stools passed during certain periods, and stools weighed every 12 hours)   Per-protocol population : 121 |
| **Funding** | No funding source explicitly cited, but SmithKline Beecham International is among the authors |
| **Notes** | / |

| ***Gharial et al* 2017** | |
| --- | --- |
| **Method** | Single-center trial: 1 hospital center in Nairobi, Kenya (Kenyatta National Hospital).  Randomized: Computer generation of numbers in blocks of different sizes. Random assignment of patients  Placebo-controlled (granules in sealed, tamper-evident brown bags, packaged by a pharmacist outside the study site).  Double blind  Parallel arms  Follow-up duration: 3 days |
| **Participants** | Total: 120 patients   - Racecadotril group: n = 60 - Placebo group: n = 60   55 girls and 65 boys  Age: 3 to 60 months  Comparable groups  Inclusion criteria:   - patients aged 3 to 60 months - with severe acute gastroenteritis (Vesikari score > 11)   Exclusion criteria:   - severe vomiting (Vesikari score of 3 - clinical diagnosis of dysentery - known kidney or liver failure - prior taking probiotics or antidiarrheals |
| **Intervention** | Intervention group: Racecadotril + ORS + Zinc  Dosage: 3 times a day for 3 days maximum (10mg if < 12 months, 30mg if > 12 months)  Control: Placebo + ORS + Zinc  Dosage: Same |
| **Definition of recovery** | Appearance of less than 3 formed stools in 24 hours |
| **Endpoints**  **+**  **Results** | **Primary endpoint :** Number of stools at 48 hours  **Mean ± SD** (Racecadotril vs Placebo):   - 6.7 *(± 0.7)* vs 6.6 *(± 0.48)* ; (p = 0.19)   → no significant difference  **Secondary endpoints :**   - Duration of diarrhea (in days)   **Mean ± SD** (Racécadotril VS Placebo):   - 2.7 *(± 0.23)* VS 2.8 *(± 0.25)* ; (p = 0.27)   → no significant difference   - Length of hospitalization (in days):   **Mean ± SD** (Racecadotril VS Placebo):   - 5.5 *(± 0.46)* VS 5.8 *(± 0.62)* ; (p = 0.48)   → no significant difference   - Number of adverse events:   **Result :**   - 14 cases of adverse events on each side (including 2 deaths on each side, and 3 cases of convulsions in the Racecadotril group including one case diagnosed with meningitis) |
| **Analysis** | ITT: Yes  Missing data :   - 5 patients did not complete the protocol due to adverse effects, including 4 deaths (2 in each group), but were included in the ITT analysis - 4 patients (2 in each group) “violated” the protocol (in addition to the previous 5) |
| **Funding** | Funding by:  - Aga Khan University (Nairobi)  - Sai Pharmaceutical Distributors (Nairobi, Kenya) |
| **Notes** | Protocol: PACTR201403000694398 |

| ***Kang et al* 2016** | |
| --- | --- |
| **Method** | Two-center trial: a hospital group at the Community Health and Development Hospital, and an outpatient group in an urban area of approximately 150,000 inhabitants, in Vellore, India.  Randomized: Randomization codes generated by a statistician not associated with the study. Randomization performed in several permuted blocks with an allocation ratio of 1: 1.  Placebo-controlled (Racecadotril or Placebo in identical packages, in sealed envelopes with randomization codes, delivered directly to the hospital pharmacy)  Double blind  Parallel arms  Follow-up duration: 5 days  Study conducted from April 2008 to September 2010 |

| **Participants** | Total: 329 patients (Hospital group: 130 + Outpatient group: 199)   - Racecadotril group: n = 167 (65 + 102) - Placebo group: n = 162 (65 + 97)   158 girls and 171 boys  Age: < 5 years  Comparable groups  Inclusion criteria:   - patients aged 3 to 59 months - with acute diarrhea (≥3 episodes of loose or liquid stools in the last 24 hours, for less than 3 days at the time of inclusion) - for the hospital group: need for hospitalization for the management of diarrhea - for the outpatient group: no need for hospitalization   Exclusion criteria:   - weight < 5kg - severe comorbidities (including pneumonia, meningitis, severe malnutrition) - chronic diarrhea (duration > 14 days) - bloody or mucous diarrhea - prior treatment with antibiotics, probiotics, steroids, medicinal plants, anti-emetics or antidiarrheals, or by another treatment of unknown nature |
| --- | --- |
| **Intervention** | Intervention group: Racecadotril + ORS  Dosage: 1.5 mg/kg, 3 times a day, for a minimum of 3 days (up to 5 days if diarrhea persists)  Control: Placebo + ORS |
| **Definition of recovery** | Last abnormal bowel movement or start of a 12-hour period without a bowel movement |
| **Endpoints**  **+**  **Results** | **Primary endpoint :** Duration of diarrhea  **Median + IQR** (Racécadotril vs Placebo):   - Hospital group (in hours):   25.5 *(IQR: 14.8 - 44.3)* *vs* 25 *(IQR: 17 - 44.5);* (p = 0.57)   - Outpatient group (in days)   2 *(IQR: 2 - 4) vs* 2 *(IQR: 2 - 4)* ; (p > 0.05)  → no significant difference in either of the 2 groups  **Secondary endpoints :**   - Quantity of stools *(no time limit specified → response obtained by email from the author: the measurement taken was the total upon leaving the hospital, after at least 12 hours without stools)*   **Median + IQR** (Racécadotril vs Placebo):   - Hospital group:   - in g/kg: 74 *(IQR: 20.6 - 159.4) vs* 53.5 *(IQR: 12.7 - 153.6)* ; (p = 0.47)  - in g/kg/h: 2.9 *(IQR: 1.3 - 4.4) vs* 2.2 *(IQR: 0.6 - 3.8)* ; (p = 0.09)   - Outpatient group: no result for this criterion   → no significant difference   - Length of hospitalization (in days):   **Median + IQR** (Racécadotril vs Placebo):   - 3 *(IQR: 2 - 4) vs* 3 *(IQR: 2 - 4)* ; (p = 0.96)   → no significant difference   - Fluid intake (in ml/kg/h):   **result + IQR** (Racecadotril vs Placebo):   - - 3.6 *(IQR: 1.9 - 5.2) vs* 3 *(IQR: 1.8 - 4.9)* ; (p = 0.36)   → no significant difference   - Presence of vomiting (in %):   **Result** (Racecadotril VS Placebo):   - 44.3% *vs.* 39.7%; (p = 0.72)   → no significant difference |
| **Analysis** | ITT: No  Per Protocol analysis on 320 patients:   - Hospital group: Total = 124   - Racecadotril: 61   - Placebo: 63 - Outpatient group: Total = 196 - Racecadotril: 99 - Placebo: 97   Missing data :   - Hospital group: - Racecadotril: 4 lost to follow-up - Placebo: 2 lost to follow-up - Outpatient group: - Racecadotril: 3 lost to follow-up - Placebo: 0 lost to follow-up |
| **Funding** | Funding by the Swedish International Development Agency |
| **Notes** | Protocols:  - CTRI/2010/091/003067  - CTRI/2007/091/000001  Unspecified measurement time for measuring the quantity of stools:  by dividing the results expressed in g/kg by those expressed in g/kg/h, we should in principle find the corresponding number of hours: here 24-25h (but no confirmation possible). |

| ***Salazar-Lindo et al* 2000** | |
| --- | --- |
| **Method** | Single-center trial: Hospital Nacional Cayetano Heredia, Lima, Peru.  Randomized (method not specified, just talking about random distribution).  Placebo controlled: Racecadotril or Placebo in powder form containing sucrose with identical appearance and taste.  Double blind  Parallel arms  Follow-up duration: 5 days  Study conducted from 1994 to 1998 |
| **Participants** | Total: 135 patients   - Racecadotril group: n = 68 - Placebo group: n = 67   Only boys  Age: 3 to 35 months  Comparable groups  Inclusion criteria:  ● patients aged 3 to 35 months  ● liquid diarrhea for 5 days maximum  ● ≥ 3 diarrheal stools in the 24 hours preceding admission, and at least 1 diarrheal stool in the 6 hours following admission  Exclusion criteria:  ● blood in the stool  ● severe dehydration  ● inability to drink (drowsiness)  ● severe concomitant pathology |
| **Intervention** | Intervention group: Racecadotril + ORS  Dosage: 1.5 mg/kg orally, every 8 hours.  Maximum 5 days, or until the diarrhea stops if stopped earlier.  Control: Placebo + ORS  Dosage: every 8 hours. |
| **Definition of recovery** | 2 stools formed in a row, or no stools for 12 hours |

| **Endpoints**  **+**  **Results** | **Primary endpoint :** Stool weight at 48 hours (in g/kg)  **Mean ± SE** (Racecadotril *vs* Placebo):   - 92 *(±12)* *vs* 170 *(± 15)* ; (p < 0.001)   → significant difference  **Secondary endpoints :**   - Stool flow at 48 hours (in g/kg/h)   **Mean ± SE** (Racécadotril *vs* Placebo):   - 1.8 *(± 0.2) vs* 3.1 *(± 0.3)* ; (p < 0.001)   → significant difference   - Total stool weight (in g/kg):   **Mean ± SE** (Racécadotril *vs* Placebo):   - Total: 157 *(± 27)* *vs* 331 *(± 39)* ; (p < 0.001) - Rotavirus + subgroup: 174 *(± 36)* *vs* 397 *(± 37)* ; (p < 0.001)   → significant difference  (including without rotavirus + patients: still 37% less with Racecadotril)   - Duration of diarrhea (in hours):   **Median** (no measurement of dispersion; Racecadotril *vs* Placebo)   - Total: not given - Rotavirus + subgroup: 28 *vs* 52; (p < 0.001) - Rotavirus - subgroup : 28 *vs* 72; (p < 0.001)   → significant difference   - Healing rate at 5 days:   **Result** (Racecadotril *vs* Placebo):   - 84% VS 66% - Total ORS intake (in ml):   **Mean ± SD** (Racécadotril *vs* Placebo):   - D1: 439 *(± 49) vs* 658 *(± 59)* ; (p < 0.001) - D2: 414 *(± 68) vs* 640 *(± 68)* ; (p < 0.001)   → significant difference   - Adverse effects (number of patients)   **Result** (Racecadotril *vs* Placebo):   - Vomiting: 35 (51%) *vs* 35 (52%) - Others: 7 (10%) *vs* 5 (7%) (none considered serious) |
| --- | --- |
| **Analysis** | ITT: Yes  Missing data replaced by LOCF method.  Missing data (Racecadotril vs Placebo):   - withdrawal of consent: 3 vs 3 - treatment considered ineffective by the doctor: 2 vs 3 - adverse effects: 1 vs 2 - blood in the stools in the first 24 hours: 1 vs 2 - need for antibiotic therapy in the first 24 hours: 0 vs 1 - protocol violation: 2 vs 3 |
| **Funding** | Subsidy by Bioprojet Pharma, Paris (developer of Racecadotril) |
| **Notes** | Trial including only boys to limit the risk of contamination of stools by urine at the time of sampling  All adverse effects were described as mild and transient by the author.  In general : more withdrawals from the study in the placebo group (n=14) compared to the Racecadotril group (n=9) even if considered insignificant by the author.  Note : more patients discharged in the Placebo group, and LOCF → potentially false positive for Racecadotril since the LOCF method imputes a pejorative value in this context, in this case concerning the placebo. |

| ***Sarangi et al* 2021** | |
| --- | --- |
| **Method** | Single-center trial: IMS & SUM Hospital (Bhubaneswar, Odisha, India).  Randomized: Computer-generated random sequence. Concealment of the randomization code by a sealed opaque envelope, by a person not directly involved in the execution of the study.  Placebo controlled: Appearance, odor, taste and dispersion identical.  Double blind  Parallel arms  Follow-up duration: 5 days  Study conducted from April 2017 to March 2018 |

| **Participants** | Total: 148 patients   - Racecadotril group: n = 74 - Placebo group: n = 74   Only boys  Age: 3 to 36 months  Groups: slight difference in proportion of liquid stools on admission (Racecadotril group: 35 patients (48%), Placebo group: 21 patients (31%)), but described as not significant (p = 0.057)  Inclusion criteria:   - patients aged 3 to 36 months - acute diarrhea with or without dehydration (acute diarrhea defined as ≥ 3 loose or liquid stools in the 24 hours preceding admission)   Exclusion criteria:   - dysentery - severe malnutrition - severe dehydration (weight/height ratio < 3 SD according to WHO) - prior treatment with antidiarrheal, antibiotic, or start of a new treatment during hospitalization - chronic pathology |
| --- | --- |
| **Intervention** | Intervention group: Racecadotril + ORS  Dosage:   - < 10kg: 10mg every 8 hours - > 10kg: 20mg every 8 hours   Until the diarrhea stops or up to 5 days maximum if diarrhea persists.  Control: Placebo + ORS  Dosage: same |
| **Definition of recovery** | 2 stools formed in a row, or no stools for 12 hours |
| **Endpoints**  **+**  **Results** | **Primary endpoint :** Stool weight at 48 hours (in g/kg)  **result ± SD** (Racecadotril *vs* Placebo):   - Total: 79.52 *(± 17.34)* *vs* 191.04 *(± 33.44)* ; (p = 0.001) - Rotavirus + subgroup: 89.47 *(± 3.71) vs* 208.0 *(± 5.41)* ; (p = 0.001)   → significant difference  **Secondary endpoints :**   - Stool flow at 48 hours (in g/h)   **Mean ± SD** (Racécadotril *vs* Placebo):   - Total: 28.5 *(± 7.4) vs* 35.9 *(± 5.9)* ; (p = 0.001)   → significant difference   - Rotavirus + subgroup: 34.84 *(± 1.39) vs* 38.55 *(± 1.27)* ; (p = 0.0557)   → no significant difference   - Length of hospitalization (in hours):   **Mean ± SD** (Racécadotril vs Placebo):   - Total: 62.4 *(± 11.4)* vs 95.6 *(± 9.5)* ; (p = 0.001) - Rotavirus + subgroup: 60.32 *(± 2.60)* vs 104.4 *(± 2.01)* ; (p = 0.001)   → significant difference   - Tolerability:   **Result** (Racecadotril VS Placebo):   - Abdominal distention: 6.9% vs 7.8% (NS) - Rebound constipation: 2.8% vs 3.5% (NS) - Vomiting: 1.4% vs 1.6% (NS) - No serious adverse events in both groups   → no significant difference |
| **Analysis** | ITT: No  Per Protocol analysis on 140 patients:   - Racecadotril group: n = 73 - Placebo group: n = 67   Missing data: no explanation of the reasons for patients' withdrawal from the study |
| **Funding** | Unspecified |
| **Notes** | / |

## **Appendix 3: Risk of bias tool (ROB2) - Algorithm**

| **1. Risk of bias arising from the randomization process** | | | | | | | | | | | | |
| --- | --- | --- | --- | --- | --- | --- | --- | --- | --- | --- | --- | --- |
| **1.1 Was the allocation sequence random?** | | **Y** | | **PY** | | | **PN** | | **NOT** | | **NEITHER** | |
| **1.2 Was the allocation sequence concealed until participants were enrolled and assigned to interventions?** | | **Y** | | **PY** | | | **PN** | | **NOT** | | **NEITHER** | |
| **1.3 Did baseline differences between intervention groups suggest a problem with the randomization process?** | | **Y** | | **PY** | | | **PN** | | **NOT** | | **NEITHER** | |
| **Risk-of-bias judgment** | | **Low** | | | | **High** | | | | **Some concerns** | | |
| **2. Risk of bias due to deviations from the intended interventions (effect of assignment to intervention)** | | | | | | | | | | | | |
| **2.1 Were participants aware of their assigned intervention during the trial?** | | **Y** | | **PY** | | | **PN** | | **NOT** | | **NEITHER** | |
| **2.2 Were carers and people delivering the interventions aware of participants' assigned intervention during the trial?** | | **Y** | | **PY** | | | **PN** | | **NOT** | | **NEITHER** | |
| **2.3 If Y/PY/NI to 2.1 or 2.2: Were there deviations from the ITT that arose because of the trial context?** | | **N / A** | **Y** | | | **PY** | | **PN** | | **NOT** | | **NEITHER** |
| **2.4 If Y/PY to 2.3: Were these deviations likely to have affected the outcome?** | | **N / A** | **Y** | | | **PY** | | **PN** | | **NOT** | | **NEITHER** |
| **2.5 If Y/PY/NI to 2.4: Were these deviations from ITT balanced between groups?** | | **N / A** | **Y** | | | **PY** | | **PN** | | **NOT** | | **NEITHER** |
| **2.6 Was an appropriate analysis used to estimate the effect of assignment to intervention?** | | **Y** | | **PY** | | | **PN** | | **NOT** | | **NEITHER** | |
| **2.7 If N/PN/NI to 2.6: Was there potential for a substantial impact on the result of the failure to analyze participants in the group to which they were randomized?** | | **N / A** | **Y** | | | **PY** | | **PN** | | **NOT** | | **NEITHER** |
| **Risk-of-bias judgment** | | **Low** | | | | **High** | | | | **Some concerns** | | |
| **3. Missing outcome data** | | | | | | | | | | | | |
| **3.1 Were data for this outcome available for all, or nearly all, randomized participants?** | | **Y** | | **PY** | | | **PN** | | **NOT** | | **NEITHER** | |
| **3.2 If N/PN/NI to 3.1: Is there evidence that the result was not biased by missing outcome data?** | | **N / A** | | **Y** | | | **PY** | | **PN** | | **NOT** | |
| **3.3 If N/PN to 3.2: Could missingness in the outcome depend on its true value?** | | **N / A** | **Y** | | | **PY** | | **PN** | | **NOT** | | **NEITHER** |
| **3.4 If Y/PY/NI to 3.3: Is it likely that missingness in the outcome depends on its true value?** | | **N / A** | **Y** | | | **PY** | | **PN** | | **NOT** | | **NEITHER** |
| **Risk-of-bias judgment** | | **Low** | | | | **High** | | | | **Some concerns** | | |
| **4. Risk of bias in measurement of the outcome** | | | | | | | | | | | | |
| **4.1 Was the method of measuring the outcome inappropriate?** | | **Y** | | **PY** | | | **PN** | | **NOT** | | **NEITHER** | |
| **4.2 Could measurement or ascertainment of the outcome have differed between intervention groups?** | | **Y** | | **PY** | | | **PN** | | **NOT** | | **NEITHER** | |
| **4.3 If N/PN/NI to 4.1 and 4.2: Were outcome assessors aware of the intervention received by study participants?** | | **N / A** | **Y** | | | **PY** | | **PN** | | **NOT** | | **NEITHER** |
| **4.4 If Y/PY/NI to 4.3: Could assessment of the outcome have been influenced by knowledge of intervention received?** | | **N / A** | **Y** | | | **PY** | | **PN** | | **NOT** | | **NEITHER** |
| **4.5 If Y/PY/NI to 4.4: Is it likely that assessment of the outcome was influenced by knowledge of the intervention received?** | | **N / A** | **Y** | | | **PY** | | **PN** | | **NOT** | | **NEITHER** |
| **Risk-of-bias judgment** | | **Low** | | | | **High** | | | | **Some concerns** | | |
| **5. Risk of bias in selection of the reported result** | | | | | | | | | | | | |
| **5.1 Were the data that produced this result analyzed in accordance with a pre-specified analysis plan that was finalized before unblinded outcome data were available for analysis?** | | **Y** | | **PY** | | | **PN** | | **NOT** | | **NEITHER** | |
| **5.2 Is the numerical result being assessed likely to have been selected from multiple eligible outcome measurements within the outcome domain?** | | **Y** | | **PY** | | | **PN** | | **NOT** | | **NEITHER** | |
| **5.3 Is the numerical result being assessed likely to have been selected from multiple eligible analysis of the data?** | | **Y** | | **PY** | | | **PN** | | **NOT** | | **NEITHER** | |
| **Risk-of-bias judgment** | | **Low** | | | | **High** | | | | **Some concerns** | | |
| **OVERALL RISK OF BIAS** | | | | | | | | | | | | |
| **LOW** | **HIGH** | | | | **SOME CONCERNS** | | | | | | | |

| **Y: Yes N : No PY: Probably Yes PN: Probably No**  **NI : Not Indicated NA : Not Applicable** |
| --- |

##

## **Appendix 4: Detailed ROB2 tables of the different tests**

### **Racecadotril: duration of diarrhea**

***ROB2 : Cézard et al - Duration of diarrhea***

| **1. Bias arising from the randomization process** | | |
| --- | --- | --- |
| 1.1 Was the allocation sequence random? | NI | Just talks about randomization without specifying the method. But double blinding specified in the method, and placebo identical to the drug, therefore domain 1 considered low risk. |
| 1.2 Was the allocation sequence concealed until participants were enrolled and assigned to interventions? | NI |
| 1.3 Did baseline differences between intervention groups suggest a problem with the randomization process? | N |  |
| **Risk of bias judgment** | **Low** | |
| **2. Bias due to deviations from intended interventions** | | |
| 2.1. Were participants aware of their assigned intervention during the trial? | PN | No information on the randomization method, but does talk about randomization and double blinding. Drug and placebo in the form of granules with a similar appearance and taste. |
| 2.2. Were carers and people delivering the interventions aware of participants' assigned intervention during the trial? | PN |
| 2.3. If Y/PY/NI to 2.1 or 2.2: Were there deviations from the intended intervention that arose because of the experimental context? | NA |  |
| 2.4 If Y/PY to 2.3: Were these deviations likely to have affected the outcome? | NA |  |
| 2.5. If Y/PY/NI to 2.4: Were these deviations from intended intervention balanced between groups? | NA |  |
| 2.6 Was an appropriate analysis used to estimate the effect of assignment to intervention? | PN | Talks about 2 analyses : Full data set and Per protocol, but Full data set not covering all patients (166 patients out of 172) |
| 2.7 If N/PN/NI to 2.6: Was there potential for a substantial impact (on the result) of the failure to analyze participants in the group to which they were randomized? | PN | Few patients affected (3.5%), and balanced : 3 patients not analyzed in the Racecadotril group, and 3 in the placebo group |
| **Risk of bias judgment** | **Some concerns** | |
| **3. Bias due to missing outcome data** | | |
| 3.1 Were data for this outcome available for all, or nearly all, randomized participants? | PY | Analysis of the primary endpoint on 166 patients, i.e. 96.5%, therefore low data loss. |
| 3.2 If N/PN/NI to 3.1: Is there evidence that the result was not biased by missing outcome data? | NA |  |
| 3.3 If N/PN to 3.2: Could missingness in the outcome depend on its true value? | NA |  |
| 3.4 If Y/PY/NI to 3.3: Is it likely that missingness in the outcome depends on its true value? | NA |
| **Risk of bias judgment** | **Low** | |
| **4. Bias in measurement of the outcome** | | |
| 4.1 Was the method of measuring the outcome inappropriate? | N |  |
| 4.2 Could measurement or ascertainment of the outcome have differed between intervention groups? | PN |  |
| 4.3 Were outcome assessors aware of the intervention received by study participants? | PN |  |
| 4.4 If Y/PY/NI to 4.3: Could assessment of the outcome have been influenced by knowledge of intervention received? | NA |  |
| 4.5 If Y/PY/NI to 4.4: Is it likely that assessment of the outcome was influenced by knowledge of intervention received? | NA |
| **Risk of bias judgment** | **Low** | |
| **5. Bias in selection of the reported result** | | |
| 5.1 Were the data that produced this result analyzed in accordance with a pre-specified analysis plan that was finalized before unblinded outcome data were available for analysis? | PY | No protocol found, but primary endpoint well described in the method, and analysis and conclusion in accordance with this criterion. |
| 5.2 ... multiple eligible outcome measurements (eg scales, definitions, time points) within the outcome domain? | N |  |
| 5.3 ... multiple eligible analyzes of the data? | N |  |
| **Risk of bias judgment** | **Low** | |
| **Overall bias** | | |
| **Some concerns** | | |

***ROB2 : Gharial et al - Duration of diarrhea***

| **1. Bias arising from the randomization process** | | |
| --- | --- | --- |
| 1.1 Was the allocation sequence random? | Y | Computer generated numbers in blocks of different sizes. Random assignment of patients. |
| 1.2 Was the allocation sequence concealed until participants were enrolled and assigned to interventions? | PY |
| 1.3 Did baseline differences between intervention groups suggest a problem with the randomization process? | PN | More girls (55%) in the Racecadotril group compared to the Placebo group (37%), but assigned randomly, with the rest of the characteristics balanced. It is considered that there is little chance that this criterion will influence the effect of the drug. |
| **Risk of bias judgment** | **Low** | |
| **2. Bias due to deviations from intended interventions** | | |
| 2.1. Were participants aware of their assigned intervention during the trial? | PN | Racecadotril and placebo : granules in tamper-proof sealed brown bags, packaged by a pharmacist off-site |
| 2.2. Were carers and people delivering the interventions aware of participants' assigned intervention during the trial? | PN |
| 2.3. If Y/PY/NI to 2.1 or 2.2: Were there deviations from the intended intervention that arose because of the experimental context? | NA |  |
| 2.4 If Y/PY to 2.3: Were these deviations likely to have affected the outcome? | NA |  |
| 2.5. If Y/PY/NI to 2.4: Were these deviations from intended intervention balanced between groups? | NA |  |
| 2.6 Was an appropriate analysis used to estimate the effect of assignment to intervention? | Y | ITT analysis results available |
| 2.7 If N/PN/NI to 2.6: Was there potential for a substantial impact (on the result) of the failure to analyze participants in the group to which they were randomized? | NA |  |
| **Risk of bias judgment** | **Low** | |
| **3. Bias due to missing outcome data** | | |
| 3.1 Were data for this outcome available for all, or nearly all, randomized participants? | PN | 9 missing patients (7.5%) : 5 because study not completed due to adverse effects (3 vs 2), including 4 deaths (2 vs 2). 4 patients (2 vs 2) who did not comply with the protocol (Flow Chart, but not cited in the text -> we assume that we have the results) |
| 3.2 If N/PN/NI to 3.1: Is there evidence that the result was not biased by missing outcome data? | N | ITT analysis, without specifying the method of imputation of missing data (LOCF or BOCF?). No analysis result in Per Protocol, although "PPA" appears in the Flow Chart, and no mention of sensitivity analysis. We therefore consider it difficult to know the impact of this lack of data on the result. |
| 3.3 If N/PN to 3.2: Could missingness in the outcome depend on its true value? | PN | The 5 patients missing due to adverse effects are probably missing due to the value of the result, but the other 4 are not. So less than 5% data loss linked to the value of the result, and missing data balanced in the 2 groups. In addition, we are mainly trying to avoid the risk of false positives, but the study concludes that there is no effect. |
| 3.4 If Y/PY/NI to 3.3: Is it likely that missingness in the outcome depends on its true value? | NA |
| **Risk of bias judgment** | **Low** | |
| **4. Bias in measurement of the outcome** | | |
| 4.1 Was the method of measuring the outcome inappropriate? | PN |  |
| 4.2 Could measurement or ascertainment of the outcome have differed between intervention groups? | N |  |
| 4.3 Were outcome assessors aware of the intervention received by study participants? | N |  |
| 4.4 If Y/PY/NI to 4.3: Could assessment of the outcome have been influenced by knowledge of intervention received? | NA |  |
| 4.5 If Y/PY/NI to 4.4: Is it likely that assessment of the outcome was influenced by knowledge of intervention received? | NA |
| **Risk of bias judgment** | **Low** | |
| **5. Bias in selection of the reported result** | | |
| 5.1 Were the data that produced this result analyzed in accordance with a pre-specified analysis plan that was finalized before unblinded outcome data were available for analysis? | Y | Protocol "PACTR201403000694398": published on "https://trialsearch.who.int/Trial2.aspx?TrialID=PACTR201403000694398"  No difference noted between the article and the protocol data. |
| 5.2 ... multiple eligible outcome measurements (eg scales, definitions, time points) within the outcome domain? | N |  |
| 5.3 ... multiple eligible analyzes of the data? | N | Analysis of the results in median and average but all the data are available and conclude with the same result (absence of effect). |
| **Risk of bias judgment** | **Low** | |
| **Overall bias** | | |
| **Low** | | |

***ROB2 : Kang et al***( ***- Duration of diarrhea***

| **1. Bias arising from the randomization process** | | |
| --- | --- | --- |
| 1.1 Was the allocation sequence random? | Y | Randomization codes generated by a statistician not associated with the study. Randomization performed in several permuted blocks with an allocation ratio of 1: 1. |
| 1.2 Was the allocation sequence concealed until participants were enrolled and assigned to interventions? | PY |
| 1.3 Did baseline differences between intervention groups suggest a problem with the randomization process? | N |  |
| **Risk of bias judgment** | **Low** | |
| **2. Bias due to deviations from intended interventions** | | |
| 2.1. Were participants aware of their assigned intervention during the trial? | PN |  |
| 2.2. Were carers and people delivering the interventions aware of participants' assigned intervention during the trial? | PN |
| 2.3. If Y/PY/NI to 2.1 or 2.2: Were there deviations from the intended intervention that arose because of the experimental context? | NA |  |
| 2.4 If Y/PY to 2.3: Were these deviations likely to have affected the outcome? | NA |  |
| 2.5. If Y/PY/NI to 2.4: Were these deviations from intended intervention balanced between groups? | NA |  |
| 2.6 Was an appropriate analysis used to estimate the effect of assignment to intervention? | N | Per protocol analysis |
| 2.7 If N/PN/NI to 2.6: Was there potential for a substantial impact (on the result) of the failure to analyze participants in the group to which they were randomized? | PN | Few lost to follow-up (2.7%). We therefore consider that the potential impact on the result is low. |
| **Risk of bias judgment** | **Some concerns** | |
| **3. Bias due to missing outcome data** | | |
| 3.1 Were data for this outcome available for all, or nearly all, randomized participants? | PY | Few lost to follow-up (2.7%)  Hospital group (n = 130): Racecadotril: 4; Placebo: 2  Outpatient group (n = 199): Racecadotril: 3; Placebo: 0 |
| 3.2 If N/PN/NI to 3.1: Is there evidence that the result was not biased by missing outcome data? | NA |  |
| 3.3 If N/PN to 3.2: Could missingness in the outcome depend on its true value? | NA |  |
| 3.4 If Y/PY/NI to 3.3: Is it likely that missingness in the outcome depends on its true value? | NA |
| **Risk of bias judgment** | **Low** | |
| **4. Bias in measurement of the outcome** | | |
| 4.1 Was the method of measuring the outcome inappropriate? | N |  |
| 4.2 Could measurement or ascertainment of the outcome have differed between intervention groups? | N |  |
| 4.3 Were outcome assessors aware of the intervention received by study participants? | PN |  |
| 4.4 If Y/PY/NI to 4.3: Could assessment of the outcome have been influenced by knowledge of intervention received? | NA |  |
| 4.5 If Y/PY/NI to 4.4: Is it likely that assessment of the outcome was influenced by knowledge of intervention received? | NA |
| **Risk of bias judgment** | **Low** | |
| **5. Bias in selection of the reported result** | | |
| 5.1 Were the data that produced this result analyzed in accordance with a pre-specified analysis plan that was finalized before unblinded outcome data were available for analysis? | Y | Protocol recorded for the 2 groups:  CTRI/2010/091/003067 and CTRI/2007/091/000001. Protocol not found for the outpatient group, but found for the hospital group: no difference noted between the study and the protocol. |
| 5.2 ... multiple eligible outcome measurements (eg scales, definitions, time points) within the outcome domain? | N |  |
| 5.3 ... multiple eligible analyzes of the data? | N |  |
| **Risk of bias judgment** | **Low** | |
| **Overall bias** | | |
| **Some concerns** | | |

***ROB2 : Salazar Lindo et al - Duration of diarrhea***

| **1. Bias arising from the randomization process** | | |
| --- | --- | --- |
| 1.1 Was the allocation sequence random? | PY | Randomization method not specified, just talking about random distribution. But double blind with Racecadotril and placebo in the form of granules of comparable taste and appearance.  As the study is a little old (2000), we consider that the randomization was probably well done and hidden. |
| 1.2 Was the allocation sequence concealed until participants were enrolled and assigned to interventions? | PY |
| 1.3 Did baseline differences between intervention groups suggest a problem with the randomization process? | N |  |
| **Risk of bias judgment** | **Low** | |
| **2. Bias due to deviations from intended interventions** | | |
| 2.1. Were participants aware of their assigned intervention during the trial? | PN | Racecadotril or Placebo presented in powder form containing sucrose with identical appearance and taste |
| 2.2. Were carers and people delivering the interventions aware of participants' assigned intervention during the trial? | PN |
| 2.3. If Y/PY/NI to 2.1 or 2.2: Were there deviations from the intended intervention that arose because of the experimental context? | NA |  |
| 2.4 If Y/PY to 2.3: Were these deviations likely to have affected the outcome? | NA |  |
| 2.5. If Y/PY/NI to 2.4: Were these deviations from intended intervention balanced between groups? | NA |  |
| 2.6 Was an appropriate analysis used to estimate the effect of assignment to intervention? | Y | ITT analysis for “patients with available data”. If a measurement was missing, the last measurement was taken (LOCF analysis). |
| 2.7 If N/PN/NI to 2.6: Was there potential for a substantial impact (on the result) of the failure to analyze participants in the group to which they were randomized? | NA |  |
| **Risk of bias judgment** | **Low** | |
| **3. Bias due to missing outcome data** | | |
| 3.1 Were data for this outcome available for all, or nearly all, randomized participants? | N | 23 premature withdrawals from the study (17%) (Racecadotril: 9; Placebo: 14) |
| 3.2 If N/PN/NI to 3.1: Is there evidence that the result was not biased by missing outcome data? | PN | Analysis in ITT, taking into account missing data only in LOCF (if a measurement was missing, the last measurement was taken). But no mention of sensitivity analyzes (eg: also using BOCF, or with a per protocol analysis). It is therefore difficult to assess the importance of the impact of the lack of data on the result. |
| 3.3 If N/PN to 3.2: Could missingness in the outcome depend on its true value? | PY | Missing data (Racecadotril vs Placebo):  - withdrawal of consent: 3 vs 3 - treatment considered ineffective by the doctor: 2 vs 3 - adverse effects: 1 vs 2 - blood in the stools in the first 24 hours: 1 vs 2 - Need for 'ATB in the first 24 hours: 0 vs 1 - protocol violation 2 vs 3So more withdrawal in the Placebo group, even if not significant in the study. Although unlikely, removal of these patients could depend on the value of the result.  Note: more patients discharged in the Placebo group, and analysis in LOCF. Therefore a risk of false positive for Racecadotril since the LOCF would here retain a pejorative value for the Placebo group. |
| 3.4 If Y/PY/NI to 3.3: Is it likely that missingness in the outcome depends on its true value? | PN |
| **Risk of bias judgment** | **Some concerns** | |
| **4. Bias in measurement of the outcome** | | |
| 4.1 Was the method of measuring the outcome inappropriate? | N |  |
| 4.2 Could measurement or ascertainment of the outcome have differed between intervention groups? | N |  |
| 4.3 Were outcome assessors aware of the intervention received by study participants? | N |  |
| 4.4 If Y/PY/NI to 4.3: Could assessment of the outcome have been influenced by knowledge of intervention received? | NA |  |
| 4.5 If Y/PY/NI to 4.4: Is it likely that assessment of the outcome was influenced by knowledge of intervention received? | NA |
| **Risk of bias judgment** | **Low** | |
| **5. Bias in selection of the reported result** | | |
| 5.1 Were the data that produced this result analyzed in accordance with a pre-specified analysis plan that was finalized before unblinded outcome data were available for analysis? | PY | No protocol found, but main endpoint well described in the method, and analysis and conclusion in accordance with this criterion. |
| 5.2 ... multiple eligible outcome measurements (eg scales, definitions, time points) within the outcome domain? | N |  |
| 5.3 ... multiple eligible analyzes of the data? | N |  |
| **Risk of bias judgment** | **Low** | |
| **Overall bias** | | |
| **Some concerns** | | |

###

### **Racecadotril: stool production**

***ROB2 : Cézard et al - Stool production at 48 hours***

| **1. Bias arising from the randomization process** | | |
| --- | --- | --- |
| 1.1 Was the allocation sequence random? | NI | Just talks about randomization without specifying the method. But double blind specified in the method, and placebo identical to the drug, therefore domain 1 considered low risk. |
| 1.2 Was the allocation sequence concealed until participants were enrolled and assigned to interventions? | NI |
| 1.3 Did baseline differences between intervention groups suggest a problem with the randomization process? | N |  |
| **Risk of bias judgment** | **Low** | |
| **2. Bias due to deviations from intended interventions** | | |
| 2.1. Were participants aware of their assigned intervention during the trial? | PN | No information on randomization method, but does talk about randomization and double blinding. Drug and placebo in the form of granules with a similar appearance and taste. |
| 2.2. Were carers and people delivering the interventions aware of participants' assigned intervention during the trial? | PN |
| 2.3. If Y/PY/NI to 2.1 or 2.2: Were there deviations from the intended intervention that arose because of the experimental context? | NA |  |
| 2.4 If Y/PY to 2.3: Were these deviations likely to have affected the outcome? | NA |  |
| 2.5. If Y/PY/NI to 2.4: Were these deviations from intended intervention balanced between groups? | NA |  |
| 2.6 Was an appropriate analysis used to estimate the effect of assignment to intervention? | PN | Talks about 2 analyses: Full data set and Per protocol, but Full data set not covering all patients (166 patients out of 172) |
| 2.7 If N/PN/NI to 2.6: Was there potential for a substantial impact (on the result) of the failure to analyze participants in the group to which they were randomized? | PN | Few patients affected (3.5%), and balanced: 3 patients not analyzed in the Racecadotril group, and 3 in the placebo group |
| **Risk of bias judgment** | **Some concerns** | |
| **3. Bias due to missing outcome data** | | |
| 3.1 Were data for this outcome available for all, or nearly all, randomized participants? | PY | Analysis of the primary endpoint on 166 patients, i.e. 96.5%, therefore low data loss. |
| 3.2 If N/PN/NI to 3.1: Is there evidence that the result was not biased by missing outcome data? | NA |  |
| 3.3 If N/PN to 3.2: Could missingness in the outcome depend on its true value? | NA |  |
| 3.4 If Y/PY/NI to 3.3: Is it likely that missingness in the outcome depends on its true value? | N A |
| **Risk of bias judgment** | **Low** | |
| **4. Bias in measurement of the outcome** | | |
| 4.1 Was the method of measuring the outcome inappropriate? | NOT | Stool weight measured by subtracting the weight of the pre-weighed diapers from that of the diapers used. |
| 4.2 Could measurement or ascertainment of the outcome have differed between intervention groups? | PN |  |
| 4.3 Were outcome assessors aware of the intervention received by study participants? | PN |  |
| 4.4 If Y/PY/NI to 4.3: Could assessment of the outcome have been influenced by knowledge of intervention received? | NA |  |
| 4.5 If Y/PY/NI to 4.4: Is it likely that assessment of the outcome was influenced by knowledge of intervention received? | NA |
| **Risk of bias judgment** | **Low** | |
| **5. Bias in selection of the reported result** | | |
| 5.1 Were the data that produced this result analyzed in accordance with a pre-specified analysis plan that was finalized before unblinded outcome data were available for analysis? | PY | No protocol found, but main endpoint well described in the method, and analysis and conclusion in accordance with this criterion. |
| 5.2 ... multiple eligible outcome measurements (eg scales, definitions, time points) within the outcome domain? | N |  |
| 5.3 ... multiple eligible analyzes of the data? | N |  |
| **Risk of bias judgment** | **Low** | |
| **Overall bias** | | |
| **Some concerns** | | |

***ROB2 : Gharial et al - Stool production at 48 hours***

| **1. Bias arising from the randomization process** | | |
| --- | --- | --- |
| 1.1 Was the allocation sequence random? | Y | Computer generation of numbers in blocks of different sizes. Random assignment of patients. |
| 1.2 Was the allocation sequence concealed until participants were enrolled and assigned to interventions? | PY |
| 1.3 Did baseline differences between intervention groups suggest a problem with the randomization process? | PN | More girls (55%) in the Racecadotril group compared to the Placebo group (37%), but assigned randomly, with the rest of the characteristics balanced. It is considered that there is little chance that this criterion will influence the effect of the drug. |
| **Risk of bias judgment** | **Low** | |
| **2. Bias due to deviations from intended interventions** | | |
| 2.1. Were participants aware of their assigned intervention during the trial? | PN | Racecadotril and placebo: granules in tamper-proof sealed brown bags, packaged by a pharmacist off-site |
| 2.2. Were carers and people delivering the interventions aware of participants' assigned intervention during the trial? | PN |
| 2.3. If Y/PY/NI to 2.1 or 2.2: Were there deviations from the intended intervention that arose because of the experimental context? | NA |  |
| 2.4 If Y/PY to 2.3: Were these deviations likely to have affected the outcome? | NA |  |
| 2.5. If Y/PY/NI to 2.4: Were these deviations from intended intervention balanced between groups? | NA |  |
| 2.6 Was an appropriate analysis used to estimate the effect of assignment to intervention? | Y | ITT analysis results available |
| 2.7 If N/PN/NI to 2.6: Was there potential for a substantial impact (on the result) of the failure to analyze participants in the group to which they were randomized? | NA |  |
| **Risk of bias judgment** | **Low** | |
| **3. Bias due to missing outcome data** | | |
| 3.1 Were data for this outcome available for all, or nearly all, randomized participants? | PN | 9 missing patients (7.5%): 5 because study not completed due to adverse effects (3 vs 2), including 4 deaths (2 vs 2). 4 patients (2 vs 2) who did not comply with the protocol (Flow Chart, but not cited in the text -> we assume that we have the results) |
| 3.2 If N/PN/NI to 3.1: Is there evidence that the result was not biased by missing outcome data? | N | ITT analysis, without specifying the method of imputation of missing data (LOCF or BOCF? ). No analysis result in Per Protocol, although "PPA" appears in the Flow Chart, and no mention of sensitivity analysis. We therefore consider it difficult to know the impact of this lack of data on the result. |
| 3.3 If N/PN to 3.2: Could missingness in the outcome depend on its true value? | PN | The 5 patients missing due to adverse effects are probably missing due to the value of the result, but the other 4 are not. So less than 5% data loss linked to the value of the result, and missing data balanced in the 2 groups. In addition, we are mainly trying to avoid the risk of false positives, but the study concludes that there is no effect. |
| 3.4 If Y/PY/NI to 3.3: Is it likely that missingness in the outcome depends on its true value? | NA |
| **Risk of bias judgment** | **Low** | |
| **4. Bias in measurement of the outcome** | | |
| 4.1 Was the method of measuring the outcome inappropriate? | PN | Number of stools reported by the parents even at the hospital (the author admits that it would have been better to measure this criterion by the staff, or to measure the weight of the stools). But same method in both groups. We therefore consider the measurement method to be non-optimal but nevertheless not wrong. |
| 4.2 Could measurement or ascertainment of the outcome have differed between intervention groups? | N | Same conditions in both groups |
| 4.3 Were outcome assessors aware of the intervention received by study participants? | N |  |
| 4.4 If Y/PY/NI to 4.3: Could assessment of the outcome have been influenced by knowledge of intervention received? | NA |  |
| 4.5 If Y/PY/NI to 4.4: Is it likely that assessment of the outcome was influenced by knowledge of intervention received? | NA |
| **Risk of bias judgment** | **Low** | |
| **5. Bias in selection of the reported result** | | |
| 5.1 Were the data that produced this result analyzed in accordance with a pre-specified analysis plan that was finalized before unblinded outcome data were available for analysis? | Y | Protocol "PACTR201403000694398": published on "https://trialsearch.who.int/Trial2.aspx?TrialID=PACTR201403000694398"  No difference noted between the article and the protocol data. |
| 5.2 ... multiple eligible outcome measurements (eg scales, definitions, time points) within the outcome domain? | N |  |
| 5.3 ... multiple eligible analyzes of the data? | N | Analysis of the results in median and average but all the data are available and conclude with the same result (absence of effect). |
| **Risk of bias judgment** | **Low** | |
| **Overall bias** | | |
| **Low** | | |

***ROB2 : Kang et al - Stool production***

| **1. Bias arising from the randomization process** | | |
| --- | --- | --- |
| 1.1 Was the allocation sequence random? | Y | Randomization codes generated by a statistician not associated with the study. Randomization performed in several permuted blocks with an allocation ratio of 1: 1. |
| 1.2 Was the allocation sequence concealed until participants were enrolled and assigned to interventions? | PY |
| 1.3 Did baseline differences between intervention groups suggest a problem with the randomization process? | N |  |
| **Risk of bias judgment** | **Low** | |
| **2. Bias due to deviations from intended interventions** | | |
| 2.1. Were participants aware of their assigned intervention during the trial? | PN |  |
| 2.2. Were carers and people delivering the interventions aware of participants' assigned intervention during the trial? | PN |
| 2.3. If Y/PY/NI to 2.1 or 2.2: Were there deviations from the intended intervention that arose because of the experimental context? | NA |  |
| 2.4 If Y/PY to 2.3: Were these deviations likely to have affected the outcome? | NA |  |
| 2.5. If Y/PY/NI to 2.4: Were these deviations from intended intervention balanced between groups? | NA |  |
| 2.6 Was an appropriate analysis used to estimate the effect of assignment to intervention? | N | Per protocol analysis. |
| 2.7 If N/PN/NI to 2.6: Was there potential for a substantial impact (on the result) of the failure to analyze participants in the group to which they were randomized? | PN | Few lost to follow-up (2.7%). We therefore consider that the potential impact on the result is low. |
| **Risk of bias judgment** | **Some concerns** | |
| **3. Bias due to missing outcome data** | | |
| 3.1 Were data for this outcome available for all, or nearly all, randomized participants? | PY | Few lost to follow-up (2.7%)  Hospital group (n = 130): Racecadotril: 4; Placebo: 2  Outpatient group (n = 199): Racecadotril: 3; Placebo: 0 |
| 3.2 If N/PN/NI to 3.1: Is there evidence that the result was not biased by missing outcome data? | NA |  |
| 3.3 If N/PN to 3.2: Could missingness in the outcome depend on its true value? | NA |  |
| 3.4 If Y/PY/NI to 3.3: Is it likely that missingness in the outcome depends on its true value? | NA |
| **Risk of bias judgment** | **Low** | |
| **4. Bias in measurement of the outcome** | | |
| 4.1 Was the method of measuring the outcome inappropriate? | PN | Weighing of stools by separating urine and stools, then comparison with pre-weighed diapers (only for boys, because too complicated for girls, but identical method in both groups) |
| 4.2 Could measurement or ascertainment of the outcome have differed between intervention groups? | N |  |
| 4.3 Were outcome assessors aware of the intervention received by study participants? | PN |  |
| 4.4 If Y/PY/NI to 4.3: Could assessment of the outcome have been influenced by knowledge of intervention received? | NA |  |
| 4.5 If Y/PY/NI to 4.4: Is it likely that assessment of the outcome was influenced by knowledge of intervention received? | NA |
| **Risk of bias judgment** | **Low** | |
| **5. Bias in selection of the reported result** | | |
| 5.1 Were the data that produced this result analyzed in accordance with a pre-specified analysis plan that was finalized before unblinded outcome data were available for analysis? | Y | Protocol recorded for the 2 groups:  CTRI/2010/091/003067 and CTRI/2007/091/000001. Protocol not found for the outpatient group, but found for the hospital group: no difference noted between the study and the protocol. |
| 5.2 ... multiple eligible outcome measurements (eg scales, definitions, time points) within the outcome domain? | N |  |
| 5.3 ... multiple eligible analyzes of the data? | N |  |
| **Risk of bias judgment** | **Low** | |
| **Overall bias** | | |
| **Some concerns** | | |

***ROB2 : Salazar Lindo et al - Stool production at 48 hours***

| **1. Bias arising from the randomization process** | | |
| --- | --- | --- |
| 1.1 Was the allocation sequence random? | PY | Randomization method not specified, just talking about random distribution. But double blind with Racecadotril and placebo in the form of granules of comparable taste and appearance.  As the study is a little old (2000), we consider that the randomization was probably well done and hidden. |
| 1.2 Was the allocation sequence concealed until participants were enrolled and assigned to interventions? | PY |
| 1.3 Did baseline differences between intervention groups suggest a problem with the randomization process? | N |  |
| **Risk of bias judgment** | **Low** | |
| **2. Bias due to deviations from intended interventions** | | |
| 2.1. Were participants aware of their assigned intervention during the trial? | PN | Racecadotril or Placebo presented in powder form containing sucrose with identical appearance and taste |
| 2.2. Were carers and people delivering the interventions aware of participants' assigned intervention during the trial? | PN |
| 2.3. If Y/PY/NI to 2.1 or 2.2: Were there deviations from the intended intervention that arose because of the experimental context? | NA |  |
| 2.4 If Y/PY to 2.3: Were these deviations likely to have affected the outcome? | NA |  |
| 2.5. If Y/PY/NI to 2.4: Were these deviations from intended intervention balanced between groups? | NA |  |
| 2.6 Was an appropriate analysis used to estimate the effect of assignment to intervention? | Y | ITT analysis for “patients with available data”. If a measurement was missing, the last measurement was taken (LOCF analysis). |
| 2.7 If N/PN/NI to 2.6: Was there potential for a substantial impact (on the result) of the failure to analyze participants in the group to which they were randomized? | NA |  |
| **Risk of bias judgment** | **Low** | |
| **3. Bias due to missing outcome data** | | |
| 3.1 Were data for this outcome available for all, or nearly all, randomized participants? | N | 23 premature withdrawals from the study (17%) (Racecadotril: 9; Placebo: 14) |
| 3.2 If N/PN/NI to 3.1: Is there evidence that the result was not biased by missing outcome data? | PN | Analysis in ITT, taking into account missing data only in LOCF (if a measurement was missing, the last measurement was taken). But no mention of sensitivity analyzes (eg: also using BOCF, or with a per protocol analysis). It is therefore difficult to assess the importance of the impact of the lack of data on the result. |
| 3.3 If N/PN to 3.2: Could missingness in the outcome depend on its true value? | PY | Missing data (Racecadotril vs Placebo):  - withdrawal of consent: 3 vs 3 - treatment considered ineffective by the doctor: 2 vs 3 - adverse effects: 1 vs 2 - blood in the stools in the first 24 hours: 1 vs 2 - need for 'ATB in the first 24 hours: 0 vs 1 - protocol violation 2 vs 3So more withdrawal in the Placebo group, even not significant in the study. Even if unlikely, the withdrawal of these patients could depend on the value of the result. Note: more patients discharged in the Placebo group, and analysis in LOCF. So there is a risk of a false positive for Racecadotril since the LOCF would retain a pejorative value here for the Placebo group. |
| 3.4 If Y/PY/NI to 3.3: Is it likely that missingness in the outcome depends on its true value? | PN |
| **Risk of bias judgment** | **Some concerns** | |
| **4. Bias in measurement of the outcome** | | |
| 4.1 Was the method of measuring the outcome inappropriate? | N |  |
| 4.2 Could measurement or ascertainment of the outcome have differed between intervention groups? | N |  |
| 4.3 Were outcome assessors aware of the intervention received by study participants? | N |  |
| 4.4 If Y/PY/NI to 4.3: Could assessment of the outcome have been influenced by knowledge of intervention received? | NA |  |
| 4.5 If Y/PY/NI to 4.4: Is it likely that assessment of the outcome was influenced by knowledge of intervention received? | NA |
| **Risk of bias judgment** | **Low** | |
| **5. Bias in selection of the reported result** | | |
| 5.1 Were the data that produced this result analyzed in accordance with a pre-specified analysis plan that was finalized before unblinded outcome data were available for analysis? | PY | No protocol found, but main endpoint well described in the method, and analysis and conclusion in accordance with this criterion. |
| 5.2 ... multiple eligible outcome measurements (eg scales, definitions, time points) within the outcome domain? | N |  |
| 5.3 ... multiple eligible analyzes of the data? | N |  |
| **Risk of bias judgment** | **Low** | |
| **Overall bias** | | |
| **Some concerns** | | |

***ROB2 : Sarangi et al - Stool production at 48 hours***

| **1. Bias arising from the randomization process** | | |
| --- | --- | --- |
| 1.1 Was the allocation sequence random? | Y | Concealed by sealed opaque envelope with randomization code. |
| 1.2 Was the allocation sequence concealed until participants were enrolled and assigned to interventions? | Y |
| 1.3 Did baseline differences between intervention groups suggest a problem with the randomization process? | PN | Slight difference in proportion of liquid stools on admission: Racecadotril group: 35 patients (48%) ; Placebo group : 21 (31%). Difference described as non-significant in the article (p = 0.057). We consider that this difference is not significant. |
| **Risk of bias judgment** | **Low** | |
| **2. Bias due to deviations from intended interventions** | | |
| 2.1. Were participants aware of their assigned intervention during the trial? | N |  |
| 2.2. Were carers and people delivering the interventions aware of participants' assigned intervention during the trial? | N |
| 2.3. If Y/PY/NI to 2.1 or 2.2: Were there deviations from the intended intervention that arose because of the experimental context? | NA |  |
| 2.4 If Y/PY to 2.3: Were these deviations likely to have affected the outcome? | NA |  |
| 2.5. If Y/PY/NI to 2.4: Were these deviations from intended intervention balanced between groups? | NA |  |
| 2.6 Was an appropriate analysis used to estimate the effect of assignment to intervention? | N | Per Protocol Analysis including only fully evaluable patients. |
| 2.7 If N/PN/NI to 2.6: Was there potential for a substantial impact (on the result) of the failure to analyze participants in the group to which they were randomized? | NI | No explanation of the reasons for withdrawal of patients who did not complete the study. |
| **Risk of bias judgment** | **High** | |
| **3. Bias due to missing outcome data** | | |
| 3.1 Were data for this outcome available for all, or nearly all, randomized participants? | PN | 8 participants did not complete the study (5.4%) |
| 3.2 If N/PN/NI to 3.1: Is there evidence that the result was not biased by missing outcome data? | PN |  |
| 3.3 If N/PN to 3.2: Could missingness in the outcome depend on its true value? | NI | No explanation of the reasons for withdrawal of patients who did not complete the study. |
| 3.4 If Y/PY/NI to 3.3: Is it likely that missingness in the outcome depends on its true value? | NI |
| **Risk of bias judgment** | **High** | |
| **4. Bias in measurement of the outcome** | | |
| 4.1 Was the method of measuring the outcome inappropriate? | N |  |
| 4.2 Could measurement or ascertainment of the outcome have differed between intervention groups? | PN |  |
| 4.3 Were outcome assessors aware of the intervention received by study participants? | N |  |
| 4.4 If Y/PY/NI to 4.3: Could assessment of the outcome have been influenced by knowledge of intervention received? | NA |  |
| 4.5 If Y/PY/NI to 4.4: Is it likely that assessment of the outcome was influenced by knowledge of intervention received? | NA |
| **Risk of bias judgment** | **Low** | |
| **5. Bias in selection of the reported result** | | |
| 5.1 Were the data that produced this result analyzed in accordance with a pre-specified analysis plan that was finalized before unblinded outcome data were available for analysis? | PY | No protocol found, but main endpoint well described in the method, and analysis and conclusion in accordance with this criterion. |
| 5.2 ... multiple eligible outcome measurements (eg scales, definitions, time points) within the outcome domain? | N |  |
| 5.3 ... multiple eligible analyzes of the data? | N |  |
| **Risk of bias judgment** | **Low** | |
| **Overall bias** | | |
| **High** | | |

###

### **Racecadotril: duration of hospitalization**

***ROB2 : Gharial et al- Length of hospitalization***

| **1. Bias arising from the randomization process** | | |
| --- | --- | --- |
| 1.1 Was the allocation sequence random? | Y | Computer generation of numbers in blocks of different sizes. Random assignment of patients. |
| 1.2 Was the allocation sequence concealed until participants were enrolled and assigned to interventions? | PY |
| 1.3 Did baseline differences between intervention groups suggest a problem with the randomization process? | PN | More girls (55%) in the Racecadotril group compared to the Placebo group (37%), but the difference attributed to chance, the rest of the characteristics being balanced, and we consider that there is little chance that this criterion influences the effect of the drug. |
| **Risk of bias judgment** | **Low** | |
| **2. Bias due to deviations from intended interventions** | | |
| 2.1. Were participants aware of their assigned intervention during the trial? | PN | Racecadotril and placebo: granules in tamper-proof sealed brown bags, packaged by a pharmacist off-site |
| 2.2. Were carers and people delivering the interventions aware of participants' assigned intervention during the trial? | PN |
| 2.3. If Y/PY/NI to 2.1 or 2.2: Were there deviations from the intended intervention that arose because of the experimental context? | NA |  |
| 2.4 If Y/PY to 2.3: Were these deviations likely to have affected the outcome? | NA |  |
| 2.5. If Y/PY/NI to 2.4: Were these deviations from intended intervention balanced between groups? | NA |  |
| 2.6 Was an appropriate analysis used to estimate the effect of assignment to intervention? | Y | ITT analysis results available |
| 2.7 If N/PN/NI to 2.6: Was there potential for a substantial impact (on the result) of the failure to analyze participants in the group to which they were randomized? | NA |  |
| **Risk of bias judgment** | **Low** | |
| **3. Bias due to missing outcome data** | | |
| 3.1 Were data for this outcome available for all, or nearly all, randomized participants? | PN | 9 missing patients (7.5%): 5 patients who did not complete the study due to adverse effects (3 vs 2), including 4 deaths (2 vs 2), but included in the ITT. 4 patients (2 vs 2) who did not comply with the protocol (according to the Flow Chart, but not cited in the text -> we assume that we have the results). |
| 3.2 If N/PN/NI to 3.1: Is there evidence that the result was not biased by missing outcome data? | N | ITT analysis, without specifying the data imputation method. No PP analysis results, although “PPA” appears in the Flow Chart, and no mention of sensitivity analysis. It is therefore difficult to know the impact of this lack of data. |
| 3.3 If N/PN to 3.2: Could missingness in the outcome depend on its true value? | PN | The 5 patients missing due to adverse effects are probably missing due to the value of the result, but the other 4 are not. So less than 5% loss of data linked to the value of the result, and above all missing data balanced in the 2 groups. In addition, we are mainly trying to avoid the risk of false positives, but the study concludes that there is no effect. |
| 3.4 If Y/PY/NI to 3.3: Is it likely that missingness in the outcome depends on its true value? | NA |
| **Risk of bias judgment** | **Low** | |
| **4. Bias in measurement of the outcome** | | |
| 4.1 Was the method of measuring the outcome inappropriate? | N |  |
| 4.2 Could measurement or ascertainment of the outcome have differed between intervention groups? | N |  |
| 4.3 Were outcome assessors aware of the intervention received by study participants? | N |  |
| 4.4 If Y/PY/NI to 4.3: Could assessment of the outcome have been influenced by knowledge of intervention received? | NA |  |
| 4.5 If Y/PY/NI to 4.4: Is it likely that assessment of the outcome was influenced by knowledge of intervention received? | NA |
| **Risk of bias judgment** | **Low** | |
| **5. Bias in selection of the reported result** | | |
| 5.1 Were the data that produced this result analyzed in accordance with a pre-specified analysis plan that was finalized before unblinded outcome data were available for analysis? | Y | Protocol "PACTR201403000694398": published on "https://trialsearch.who.int/Trial2.aspx?TrialID=PACTR201403000694398"  No difference noted between the article and the protocol data. |
| 5.2 ... multiple eligible outcome measurements (eg scales, definitions, time points) within the outcome domain? | N |  |
| 5.3 ... multiple eligible analyzes of the data? | N | Analysis of the results in median and average but all the data are available and conclude with the same result (absence of effect). |
| **Risk of bias judgment** | **Low** | |
| **Overall bias** | | |
| **Low** | | |

***ROB2 : Kang et al - Length of hospitalization***

| **1. Bias arising from the randomization process** | | |
| --- | --- | --- |
| 1.1 Was the allocation sequence random? | Y | Randomization codes generated by a statistician not associated with the study. Randomization performed in several permuted blocks with an allocation ratio of 1: 1. |
| 1.2 Was the allocation sequence concealed until participants were enrolled and assigned to interventions? | PY |
| 1.3 Did baseline differences between intervention groups suggest a problem with the randomization process? | N |  |
| **Risk of bias judgment** | **Low** | |
| **2. Bias due to deviations from intended interventions** | | |
| 2.1. Were participants aware of their assigned intervention during the trial? | PN |  |
| 2.2. Were carers and people delivering the interventions aware of participants' assigned intervention during the trial? | PN |
| 2.3. If Y/PY/NI to 2.1 or 2.2: Were there deviations from the intended intervention that arose because of the experimental context? | NA |  |
| 2.4 If Y/PY to 2.3: Were these deviations likely to have affected the outcome? | NA |  |
| 2.5. If Y/PY/NI to 2.4: Were these deviations from intended intervention balanced between groups? | NA |  |
| 2.6 Was an appropriate analysis used to estimate the effect of assignment to intervention? | N | Per protocol analysis. |
| 2.7 If N/PN/NI to 2.6: Was there potential for a substantial impact (on the result) of the failure to analyze participants in the group to which they were randomized? | PN | Few lost to follow-up (2.7%). We therefore consider that the potential impact on the result is low. |
| **Risk of bias judgment** | **Some concerns** | |
| **3. Bias due to missing outcome data** | | |
| 3.1 Were data for this outcome available for all, or nearly all, randomized participants? | PY | Few lost to follow-up given the number (2.7%)  Hospital group (n = 130): Racecadotril: 4; Placebo: 2  Outpatient group (n = 199): Racecadotril: 3; Placebo: 0 |
| 3.2 If N/PN/NI to 3.1: Is there evidence that the result was not biased by missing outcome data? | NA |  |
| 3.3 If N/PN to 3.2: Could missingness in the outcome depend on its true value? | NA |  |
| 3.4 If Y/PY/NI to 3.3: Is it likely that missingness in the outcome depends on its true value? | NA |
| **Risk of bias judgment** | **Low** | |
| **4. Bias in measurement of the outcome** | | |
| 4.1 Was the method of measuring the outcome inappropriate? | N |  |
| 4.2 Could measurement or ascertainment of the outcome have differed between intervention groups? | N |  |
| 4.3 Were outcome assessors aware of the intervention received by study participants? | PN |  |
| 4.4 If Y/PY/NI to 4.3: Could assessment of the outcome have been influenced by knowledge of intervention received? | NA |  |
| 4.5 If Y/PY/NI to 4.4: Is it likely that assessment of the outcome was influenced by knowledge of intervention received? | NA |
| **Risk of bias judgment** | **Low** | |
| **5. Bias in selection of the reported result** | | |
| 5.1 Were the data that produced this result analyzed in accordance with a pre-specified analysis plan that was finalized before unblinded outcome data were available for analysis? | PN | Protocol recorded, the duration of hospitalization was not cited among the judgment criteria.  CTRI/2010/091/003067 and CTRI/2007/091/000001 Protocol found for the hospital group but not for the outpatient group. |
| 5.2 ... multiple eligible outcome measurements (eg scales, definitions, time points) within the outcome domain? | N |  |
| 5.3 ... multiple eligible analyzes of the data? | N |  |
| **Risk of bias judgment** | **Some concerns** | |
| **Overall bias** | | |
| **Some concerns** | | |

***ROB2: Sarangi et al - Length of hospitalization***

| **1. Bias arising from the randomization process** | | |
| --- | --- | --- |
| 1.1 Was the allocation sequence random? | Y | Concealed by sealed opaque envelope with randomization code. |
| 1.2 Was the allocation sequence concealed until participants were enrolled and assigned to interventions? | Y |
| 1.3 Did baseline differences between intervention groups suggest a problem with the randomization process? | PN | Slight difference in proportion of liquid stools on admission: Racecadotril group: 35 patients (48%) ; Placebo group : 21 (31%). Difference described as non-significant in the article (p = 0.057). We consider that this difference is not significant. |
| **Risk of bias judgment** | **Low** | |
| **2. Bias due to deviations from intended interventions** | | |
| 2.1. Were participants aware of their assigned intervention during the trial? | N |  |
| 2.2. Were carers and people delivering the interventions aware of participants' assigned intervention during the trial? | N |
| 2.3. If Y/PY/NI to 2.1 or 2.2: Were there deviations from the intended intervention that arose because of the experimental context? | NA |  |
| 2.4 If Y/PY to 2.3: Were these deviations likely to have affected the outcome? | NA |  |
| 2.5. If Y/PY/NI to 2.4: Were these deviations from intended intervention balanced between groups? | NA |  |
| 2.6 Was an appropriate analysis used to estimate the effect of assignment to intervention? | N | Per Protocol Analysis including only fully evaluable patients. |
| 2.7 If N/PN/NI to 2.6: Was there potential for a substantial impact (on the result) of the failure to analyze participants in the group to which they were randomized? | NI | No explanation of the reasons for withdrawal of patients who did not complete the study. |
| **Risk of bias judgment** | **High** | |
| **3. Bias due to missing outcome data** | | |
| 3.1 Were data for this outcome available for all, or nearly all, randomized participants? | PN | 8 participants did not complete the study (5.4%) |
| 3.2 If N/PN/NI to 3.1: Is there evidence that the result was not biased by missing outcome data? | PN |  |
| 3.3 If N/PN to 3.2: Could missingness in the outcome depend on its true value? | NI | No explanation of the reasons for withdrawal of patients who did not complete the study. |
| 3.4 If Y/PY/NI to 3.3: Is it likely that missingness in the outcome depends on its true value? | NI |
| **Risk of bias judgment** | **High** | |
| **4. Bias in measurement of the outcome** | | |
| 4.1 Was the method of measuring the outcome inappropriate? | N |  |
| 4.2 Could measurement or ascertainment of the outcome have differed between intervention groups? | PN |  |
| 4.3 Were outcome assessors aware of the intervention received by study participants? | N |  |
| 4.4 If Y/PY/NI to 4.3: Could assessment of the outcome have been influenced by knowledge of intervention received? | NA |  |
| 4.5 If Y/PY/NI to 4.4: Is it likely that assessment of the outcome was influenced by knowledge of intervention received? | NA |
| **Risk of bias judgment** | **Low** | |
| **5. Bias in selection of the reported result** | | |
| 5.1 Were the data that produced this result analyzed in accordance with a pre-specified analysis plan that was finalized before unblinded outcome data were available for analysis? | PY | No protocol found, but main endpoint well described in the method, and analysis and conclusion in accordance with this criterion. |
| 5.2 ... multiple eligible outcome measurements (eg scales, definitions, time points) within the outcome domain? | N |  |
| 5.3 ... multiple eligible analyzes of the data? | N |  |
| **Risk of bias judgment** | **Low** | |
| **Overall bias** | | |
| **High** | | |
